# Supplementary material for: Systematic Investigations of Annealing and Functionalization of Carbon Nanotube Yarns
Source: MDPI journal article supplement (doi:10.3390/molecules25051144), 2020-03-04
Supplement: s1 [file s1]

Supporting Information

# Systematic investigations of annealing and functionalization of carbon nanotube yarns

Maik Scholz<sup>1,2</sup>, Yasuhiko Hayashi<sup>3\*</sup>, Victoria Eckert<sup>1,2</sup>, Vyacheslav Khavrus<sup>1§</sup>, Albrecht Leonhardt<sup>1</sup>, Bernd Büchner<sup>1,4</sup>, Michael Mertig<sup>2,5</sup>, Silke Hampel<sup>1\*</sup>

<sup>1</sup> Leibniz Institute for Solid State and Material Research Dresden, Helmholtzstr. 20, 01069 Dresden, Germany

<sup>2</sup> Institute for Physical Chemistry, Technical University of Dresden, 01062 Dresden, Germany

<sup>3</sup> Graduate School of Natural Science and Technology, Okayama University, 3-1-1 Tsushima-naka, Kita, Okayama 700-8530, Japan

<sup>4</sup> Institute for Solid State Physics, Technical University of Dresden, 01062 Dresden, Germany

<sup>5</sup> Kurt-Schwabe-Institut für Mess- und Sensortechnik e.V. Meinsberg, 04736 Waldheim, Germany

<sup>§</sup> Current address: Life Science Inkubator Sachsen GmbH & Co. KG, Tatzberg 47, 01307 Dresden, Germany (Vyacheslav Khavrus)

\* Correspondence: E-mail: S.Hampel@ifw-dresden.de; Tel: +49 (0) 351-4659-323 (S.H.) and E-mail: hayashi.yasuhiko@okayama-u.ac.jp; Tel: +81 (0) 86-251-8230 (Y.H.)

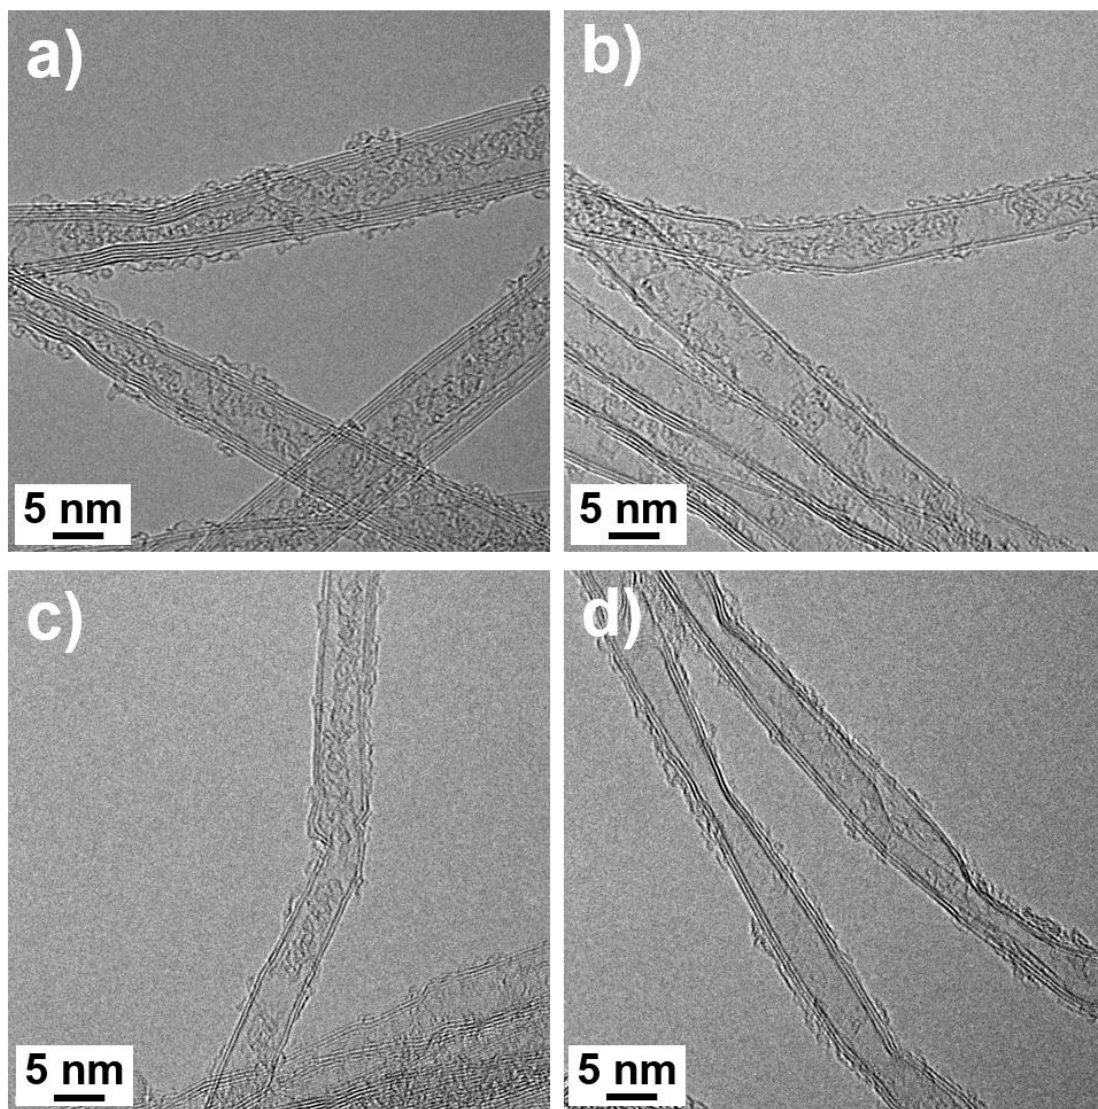

Figure S1: TEM images of pristine CNY.

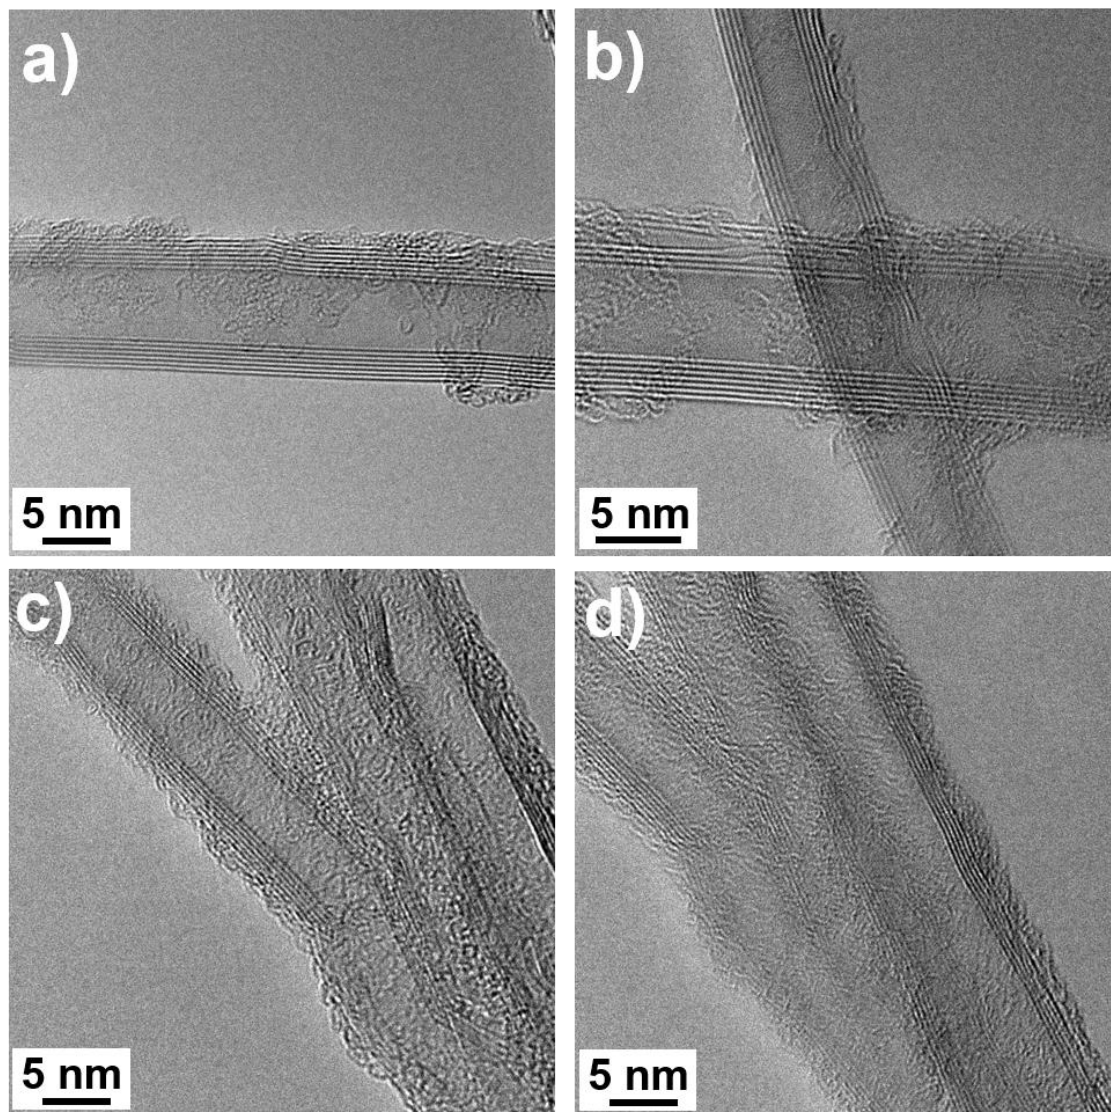

Figure S2: TEM images of annealed CNY for 2h at 2500°C

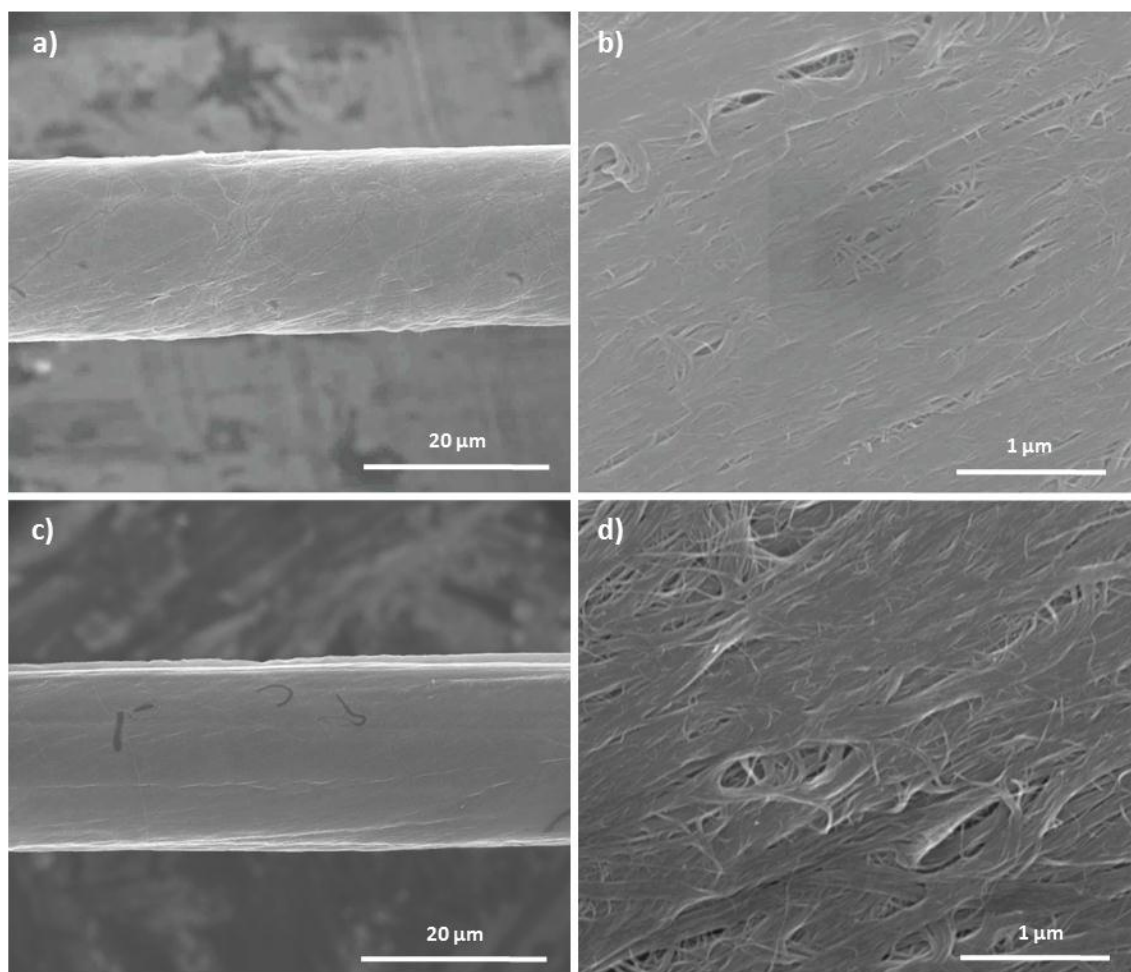

Figure S3: SEM images of CNY after treatment with  $H_2O_2$ : a) and b) after 3 h and c) and d) after 216 h treatment time.

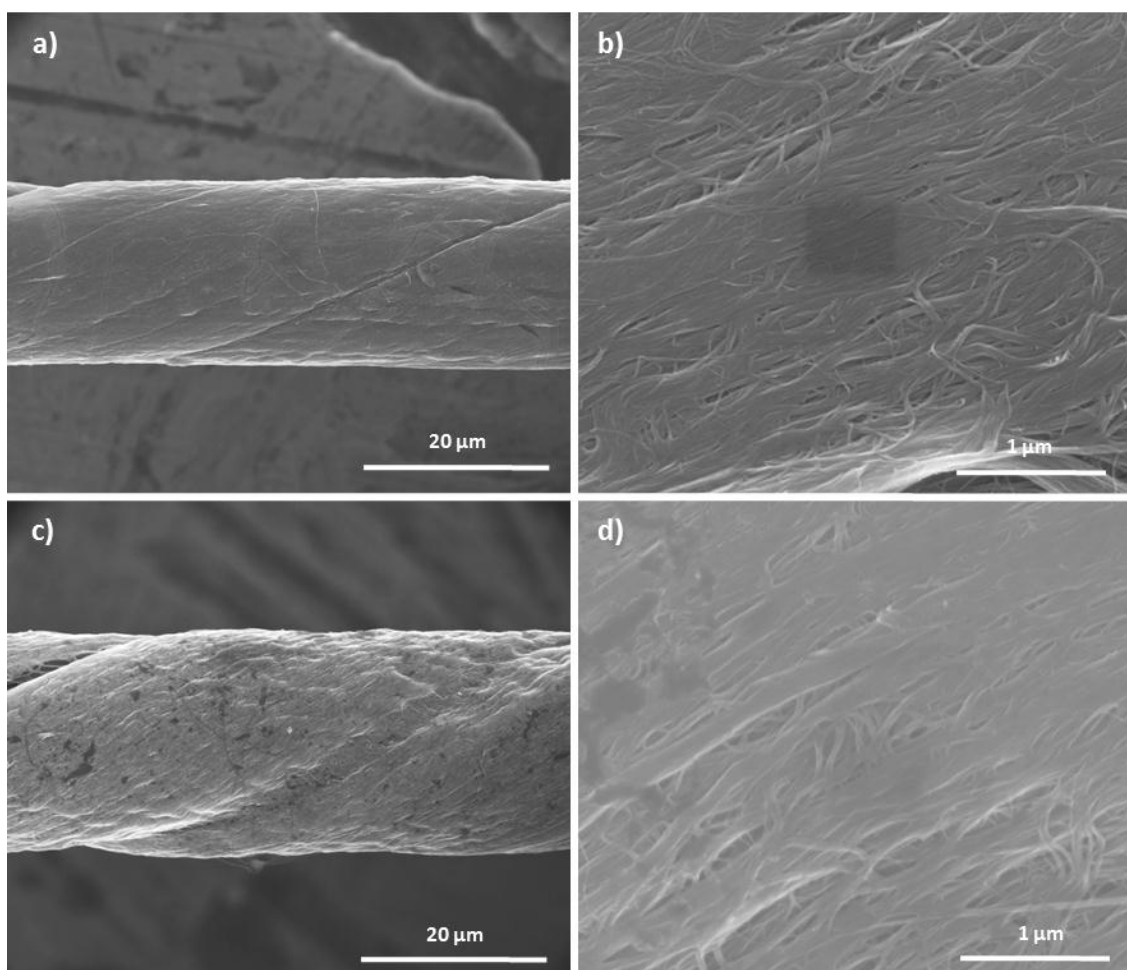

Figure S4: SEM images of CNY after treatment with HCl: a) and b) after 3 h and c) and d) after 216 h treatment time.

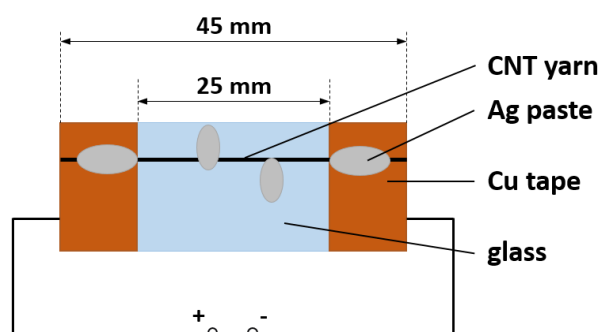

Figure S5: Detailed schematic illustration of the sample holder with fixed CNY for four-point measurements.
